# Supplementary material
Source: PubMed Central journal article supplement (PMC4891990)
Supplement: 000238.pdf [file 000238.pdf]

**Table S1 Primers used in this study**

| Target  | FWD                        | REV                        | Amplicon size | Primer efficiency | Present in strains |
|---------|----------------------------|----------------------------|---------------|-------------------|--------------------|
| 16S     | TAA GCC GAG GGC TTT CAC AT | AGA GAC TGA TCG GCC ACA TT | 323           | 98%               | VMC1-8             |
| Phage 1 | GTG CAA GCT TCA TCA ACA TC | AGT ATG AGC CAG CTG GTA AT | 203           | 110%              | VMC1-8             |
| Phage 2 | ATT GTT AGA TTG GCA TGC GC | GCA TAA TTT GCT TCT GCA GC | 321           | 105%              | VMC1-8             |
| Phage 3 | GAA GTT TGG GTG CTG ATG TC | TTG ATC ACT TGC ATA GCT GC | 332           | 106%              | VMC1, 4, 5, 6, 8   |
| Phage 4 | CAT GGG CTA TTT CTA TGC CA | TCG GTA AAT TGC CAG ATT GC | 257           | 86%               | VMC4, 6            |
| Phage 5 | CAT GGG CTA TTT CTA TGC CA | ATT GAG AAC TAC CCG AAC TA | 294           | 88%               | VMC2               |

**Table S2 Participant metadata**

|                                | VMC1                  | VMC2  | VMC3              | VMC4        | VMC5   | VMC6             | VMC7 | VMC8 |
|--------------------------------|-----------------------|-------|-------------------|-------------|--------|------------------|------|------|
| Age                            | 24                    | 34    | 41                | 39          | 38     | 29               | 47   | 29   |
| Ethnicity <sup>1</sup>         | AA                    | AA    | AA                | AA          | NA     | C                | C    | C    |
| Pregnant                       | No                    | Yes   | No                | No          | NA     | No               | No   | No   |
| Smoker                         | NA                    | NA    | No                | No          | NA     | Yes              | No   | No   |
| Sexual partners(#)             | 11-20                 | 11-20 | >=21              | 6-10        | NA     | 3-5              | 1    | 3-5  |
| Sexual partners<br>(gender)    | Male                  | Male  | Male              | Male        | NA     | Male             | Male | Male |
| Birth control                  | OCP                   | NA    | Tubal<br>ligation | OCP,<br>IUD | NA     | OCP,<br>Sprintec | NA   | IUD  |
| Clinical dx                    | Abnormal<br>discharge | NA    | BV                | NA          | Normal | Normal           | NA   | NA   |
| BV history                     | Yes                   | Yes   | Yes               | Yes         | NA     | No               | No   | No   |
| Vaginal discharge <sup>2</sup> | Yes                   | Yes   | Yes               | Yes         | NA     | No               | No   | No   |
| Vaginal odor <sup>2</sup>      | Yes                   | Yes   | Yes               | No          | NA     | No               | No   | No   |

---

|                              |     |     |     |     |    |    |    |    |
|------------------------------|-----|-----|-----|-----|----|----|----|----|
| Vaginal itching <sup>2</sup> | Yes | Yes | Yes | Yes | NA | No | No | No |
|------------------------------|-----|-----|-----|-----|----|----|----|----|

---

Participant metadata was collected from health history questionnaires. NA is the designation for “Not Answered”.

<sup>1</sup>Self-reported ethnicity: African American (AA) or Caucasian (C).

<sup>2</sup>Symptoms reported by the participant at the time of sampling.

**Table S3 Insertion sequences identified in strains**

| <b>Strain designation</b> | <b>Insertion Sequence Family<sup>1</sup></b> | <b>Number of IS</b> |
|---------------------------|----------------------------------------------|---------------------|
| VMC1                      | IS4_ssgr_IS4                                 | 4                   |
|                           | IS200_IS605_ssgr_IS1341                      | 2                   |
|                           | ISL3                                         | 5                   |
|                           | ISLre2                                       | 1                   |
|                           | IS607                                        | 1                   |
|                           | ISNCY_ssgr_IS1202                            | 1                   |
|                           | IS256                                        | 1                   |
|                           | IS4_ssgr_ISPepr1                             | 2                   |
|                           | ISNCY                                        | 3                   |
|                           | IS66                                         | 1                   |
|                           | IS30                                         | 5                   |
|                           | IS3_ssgr_IS150                               | 4                   |
|                           | IS200_IS605                                  | 5                   |
|                           | IS1182                                       | 5                   |

|      |                         |    |
|------|-------------------------|----|
|      | IS982                   | 3  |
|      | IS110                   | 6  |
| VMC2 | IS4_ssgr_IS4            | 4  |
|      | IS200_IS605_ssgr_IS1341 | 2  |
|      | ISL3                    | 2  |
|      | IS5_ssgr_ISL2           | 1  |
|      | ISLre2                  | 1  |
|      | IS607                   | 1  |
|      | ISNCY_ssgr_IS1202       | 1  |
|      | IS256                   | 18 |
|      | IS4_ssgr_ISPepr1        | 3  |
|      | ISNCY                   | 3  |
|      | IS66                    | 2  |
|      | IS30                    | 14 |
|      | IS3_ssgr_IS150          | 4  |
|      | IS200_IS605             | 12 |

|      |                         |    |
|------|-------------------------|----|
|      | IS1182                  | 5  |
|      | IS982                   | 17 |
|      | IS110                   | 12 |
| VMC3 | IS4_ssgr_IS4            | 1  |
|      | IS200_IS605_ssgr_IS1341 | 2  |
|      | ISL3                    | 4  |
|      | ISLre2                  | 1  |
|      | IS256                   | 14 |
|      | IS4_ssgr_ISPepr1        | 4  |
|      | ISNCY                   | 2  |
|      | IS30                    | 6  |
|      | IS3_ssgr_IS150          | 2  |
|      | IS200_IS605             | 1  |
|      | IS1182                  | 4  |
|      | IS982                   | 11 |
|      | IS110                   | 1  |

|      |                         |    |
|------|-------------------------|----|
| VMC4 | IS4_ssgr_IS4            | 4  |
|      | IS200_IS605_ssgr_IS1341 | 6  |
|      | ISL3                    | 3  |
|      | ISLre2                  | 8  |
|      | IS607                   | 2  |
|      | ISNCY_ssgr_IS1202       | 1  |
|      | IS256                   | 64 |
|      | IS4_ssgr_ISPepr1        | 8  |
|      | IS66                    | 1  |
|      | IS30                    | 21 |
|      | IS3_ssgr_IS150          | 6  |
|      | IS200_IS605             | 3  |
|      | IS1182                  | 9  |
|      | IS982                   | 17 |
|      | IS110                   | 8  |
| VMC5 | IS4_ssgr_IS4            | 2  |

|                         |    |
|-------------------------|----|
| IS200_IS605_ssgr_IS1341 | 2  |
| ISL3                    | 5  |
| IS5_ssgr_ISL2           | 1  |
| ISLre2                  | 1  |
| IS607                   | 1  |
| ISNCY_ssgr_IS1202       | 1  |
| IS256                   | 45 |
| IS4_ssgr_ISPepr1        | 5  |
| ISNCY                   | 3  |
| IS66                    | 2  |
| IS30                    | 13 |
| IS3_ssgr_IS150          | 4  |
| IS200_IS605             | 5  |
| IS1182                  | 8  |
| IS982                   | 33 |
| IS110                   | 8  |



|      |                         |    |
|------|-------------------------|----|
| VMC6 | IS4_ssgr_IS4            | 4  |
|      | IS200_IS605_ssgr_IS1341 | 9  |
|      | ISL3                    | 4  |
|      | IS5_ssgr_ISL2           | 1  |
|      | ISLre2                  | 3  |
|      | IS607                   | 1  |
|      | ISNCY_ssgr_IS1202       | 1  |
|      | IS256                   | 64 |
|      | IS4_ssgr_ISPepr1        | 4  |
|      | ISNCY                   | 3  |
|      | IS66                    | 2  |
|      | IS30                    | 25 |
|      | IS3_ssgr_IS150          | 7  |
|      | IS200_IS605             | 6  |
|      | IS1182                  | 2  |
|      | IS982                   | 13 |

|      |                         |    |
|------|-------------------------|----|
|      | IS110                   | 6  |
| VMC7 | IS4_ssgr_IS4            | 3  |
|      | IS200_IS605_ssgr_IS1341 | 3  |
|      | ISL3                    | 2  |
|      | ISLre2                  | 2  |
|      | IS607                   | 1  |
|      | ISNCY_ssgr_IS1202       | 1  |
|      | IS256                   | 78 |
|      | IS4_ssgr_ISPepr1        | 6  |
|      | ISNCY                   | 2  |
|      | IS66                    | 1  |
|      | IS30                    | 7  |
|      | IS3_ssgr_IS150          | 3  |
|      | IS200_IS605             | 3  |
|      | IS1182                  | 5  |
|      | IS982                   | 20 |

|      |                         |    |
|------|-------------------------|----|
|      | IS110                   | 4  |
| VMC8 | IS4_ssgr_IS4            | 3  |
|      | IS200_IS605_ssgr_IS1341 | 5  |
|      | ISL3                    | 5  |
|      | IS5_ssgr_ISL2           | 1  |
|      | ISLre2                  | 1  |
|      | IS607                   | 2  |
|      | ISNCY_ssgr_IS1202       | 1  |
|      | IS256                   | 77 |
|      | IS4_ssgr_ISPepr1        | 3  |
|      | ISNCY                   | 2  |
|      | IS66                    | 1  |
|      | IS30                    | 20 |
|      | IS3_ssgr_IS150          | 8  |
|      | IS200_IS605             | 7  |
|      | IS1182                  | 2  |

IS982

23

---

IS110

7

---

<sup>1</sup>Descriptions of IS families can be found through the IS Finder database (<https://www-is.biotoul.fr/>)

**Table S4 Genes exclusive to BV strains**

| <b>Gene Locus</b> | <b>Gene annotation</b>                    | <b>Amino acid sequence</b>                                                                                                                                                                            |
|-------------------|-------------------------------------------|-------------------------------------------------------------------------------------------------------------------------------------------------------------------------------------------------------|
| AEL93_09295       | PTS cellobiose<br>transporter subunit IIA | MAEEKKTPEQKEQETLMAAMGLIANGGNAKSLAFEAIRLAKKGDIAGA<br>REKLKESDKSLLEAHNSQTGMLTKEAQGDHMHVTLVVSQDHLMN<br>AITFRDLAGEMVDLYEKLYESGSLKKEDK                                                                     |
| AEL93_10590       | PTS cellobiose<br>transporter subunit IIA | YFTVSRHEDSIKYMYSRYLLIRYIITIFFFTNLMWLIIDVNYHSVLGIIVS<br>AIMTIYSGIASIEQLTKMHNKRKREVPISKVYLEVQAALNLLFIMLTFLPLG<br>KYLFPFIENQSIMFFMTTLFLAGILLCVWSEYRIHQIMNDQDRYHKVIET<br>FKKHQQ                           |
| AEL93_09300       | PTS cellobiose<br>transporter subunit IIB | MAEQTIMLNCSAGMSTSLLVTKMQAAAKEQGIDAEIFACPASEADDK<br>MAQQEIDCVLLGPQVSYMKSDFENKVKGKGKDGKDIPLDVINMQDY<br>GMMNGANVLAQAELIKGE                                                                               |
| AEL93_09780       | 6-phospho-beta-<br>glucosidase            | MSFTKEFTWGGATAANQYEGGYDEGCKGLNAVDVLTNGSATEPRK<br>VTWKKPNGETGATPLVWGQEFSLPKGAVPTILDGYYYPSHQGTDFY<br>HHYQEDTKLMADMGFDFRLSMNWSRILPNGDDEQPNEDGLAFYDK<br>VFDECAKYGIEPLVTLSHYETPLSLITRYGGWKDRHLIDAFVHYSDIVM |

---

KHYKGVRYWLTFFNEINAMDMAPYMGGLIDGSEQNRAQGAHNQF  
VASAKVVKLAHEIDPNNRVGQMLAYSAYYPYTCDPADQLKVLEAKQE  
MLFYSDVQTGGRYPNYRLKKYERDGIKLNTPEDYELIAKYPADFLSF  
SCYTSNVLTTHHEADAKANGNVSAGGVNPPYLESNAWG WATDPDVLR  
IGLNELWDRYHKPLWVVENGLGSADTLEKDGSIHNYRIDYLRDQIKS  
MRDAVTIDGVDLMGYTTWSAIDLVSNGTGEMKKRYGFVYVDRDDRG  
NGSLKRYPKDSFYWYKKAITSNGEDLD

---

|             |                            |                                                   |
|-------------|----------------------------|---------------------------------------------------|
| AEL93_09785 | hypothetical protein       | MITITKQFNFKAKDFFDYLEEnQLIPAIKKARGNDMPVTLAKGTKYEVD |
|             | <b>(ligand-binding</b>     | GAQVKLTDYERNKVYGAHFKTDRMELVINYVTE DNDQG VKITFSEDM |
|             | <b>domain superfamily)</b> | LSFDREKHGKLQTMFYNFQLKMGAKKELRRMGDNVLANIAA         |

---

|             |                         |                                                        |
|-------------|-------------------------|--------------------------------------------------------|
| AEL93_09790 | PTS cellobiose          | LTSTMRITFTTKM VAGGYEASTNGITRIAAVGIFTGLVIAWLT VQIYR     |
|             | transporter subunit IIC | YTVKHNWRIKMPASVPSGVSNSFSALIPGFCIAVVVALIELILVTLGTDI     |
|             |                         | FQVLYIPFSFISAIADTWWGFLIIIFLIHFLWWFGI HGATIMSSFYTPIVLA  |
|             |                         | NMAANVNGANHFFAGDPMNSFVIIGGSGATLGMAIWLAFGS RSAQLK       |
|             |                         | EIGKVELVPAIFNINEPLL FGLPIVYNINLLV PFICAPLASGLVGYIAVTSH |
|             |                         | LVPKIIVQQPWPTPVGLSGYLATT SWQGAVLSIVCALVAFLVWFLFIKH     |

---

---

YDNVLLKKEQADATKN

---

AEL93\_10595

PTS cellobiose

MADSKSGSFKDALAAKAGKFAGSRFVRAIMDAGYSVISFSIIGAVFLIL

transporter subunit IIC

NVLPQAFPIPGFAAFYANTLGRFSGLFQVVYNSTMGILALVFAGTFAY

SYTDIYRREEKIDLVPMNGLMMFLMAFFITFPELIWKNQAVQFITTRVV

LVK

---
